# Supplementary material for: The Preferential Therapeutic Potential of Chlorella vulgaris against Aflatoxin-Induced Hepatic Injury in Quail
Source: MDPI journal article supplement (doi:10.3390/toxins14120843), 2022-12-01
Supplement: s1 [file s1]

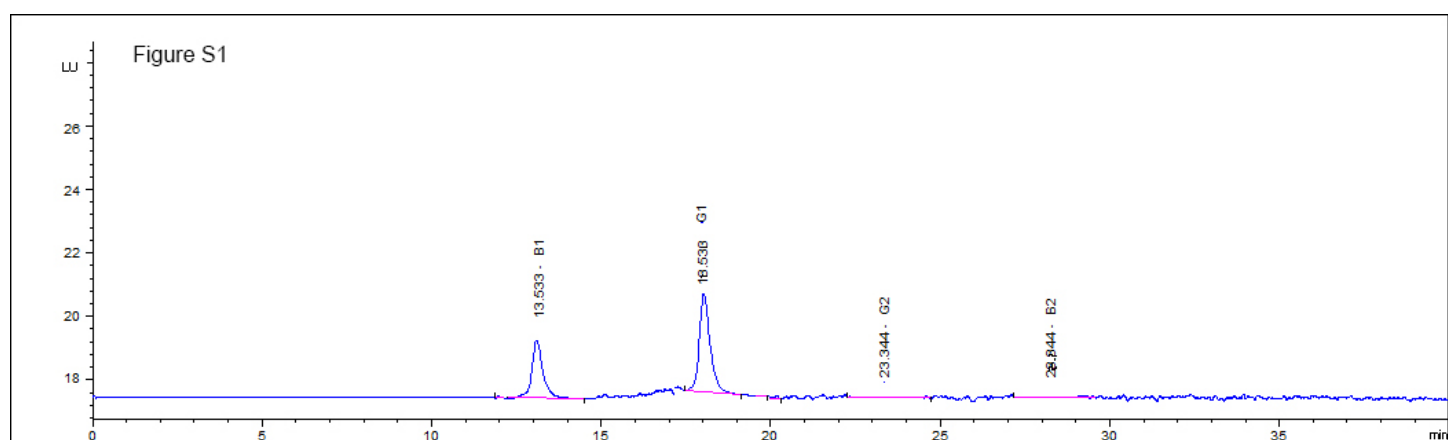

Figure S1: A representative chromatogram of AF detected in liver tissue

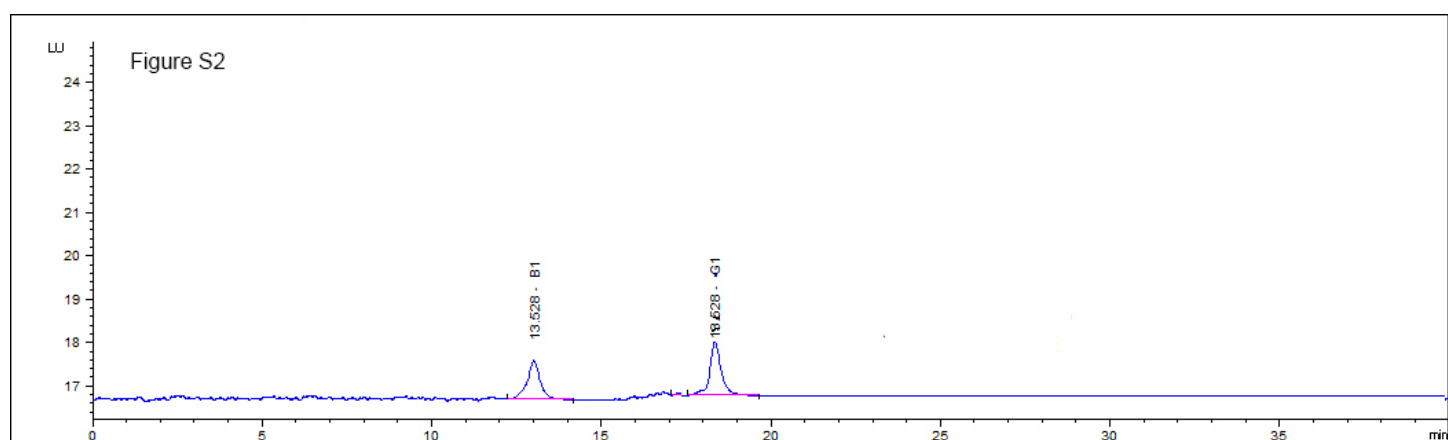

Figure S2: A representative chromatogram of AF detected in meat
